# Supplementary material for: Spatiotemporal and Socioeconomic Risk Factors for Dengue at the Province Level in Vietnam, 2013–2015: Clustering Analysis and Regression Model
Source: MDPI journal article supplement (doi:10.3390/tropicalmed5020081), 2020-05-19

## Supplementary Materials

Supplementary Table S1. Summary statistics, dengue case counts 2013–2015.

| <b>Annual dengue case counts, all province-years 2013-15</b> |          |
|--------------------------------------------------------------|----------|
| Arithmetic mean                                              | 1117.898 |
| Maximum                                                      | 15412    |
| Minimum                                                      | 0        |
| Standard deviation                                           | 2046.175 |
| Coefficient of variation                                     | 1.83     |

Supplementary Table S2. Definitions, units, rationale and source of socioeconomic exposures (annual province-level data for the years 2013–2015 inclusive).

|                    |                                                                                                                                                                                                                                                                                                                                                                                                                                              |                                           |                                                                                                                                                                                                                   |                                                                                        |
|--------------------|----------------------------------------------------------------------------------------------------------------------------------------------------------------------------------------------------------------------------------------------------------------------------------------------------------------------------------------------------------------------------------------------------------------------------------------------|-------------------------------------------|-------------------------------------------------------------------------------------------------------------------------------------------------------------------------------------------------------------------|----------------------------------------------------------------------------------------|
| Poverty rate       | The percentage of people or households with per capita income lower than the poverty line. The poverty line is the cost of a basket of essential food (determined by each province as locally appropriate) plus a minimum level of expenditure for non-food items such as housing, clothing, household appliances, 'cultural learning' items, entertainment, medicine, and travel. It is adjusted by province-weighted consumer price index. | Percent (people), continuous variable     | The literature on association between dengue and poverty is conflicted, and there is no country-wide analysis of this for Vietnam. It is therefore an important avenue for consideration in this analysis.        | Survey of Vietnamese People's Living Standards<br>General Statistics Office of Vietnam |
| Electricity access | Percentage of households with access to electricity.                                                                                                                                                                                                                                                                                                                                                                                         | Percent (households), continuous variable | Electricity access is an indicator of the quality of public infrastructure in each province, which is relevant for public health planners trying to ascertain its association with dengue fever in the context of | General statistics Office of Vietnam.                                                  |

---

|                    |                                                                                                                                                                                                                                                                                              |                                                                |                                                                                                                                                                                                                                                                                                                                                                                                                                                                                                                                                                                                            |                                                                                                                                                                                                                                                   |
|--------------------|----------------------------------------------------------------------------------------------------------------------------------------------------------------------------------------------------------------------------------------------------------------------------------------------|----------------------------------------------------------------|------------------------------------------------------------------------------------------------------------------------------------------------------------------------------------------------------------------------------------------------------------------------------------------------------------------------------------------------------------------------------------------------------------------------------------------------------------------------------------------------------------------------------------------------------------------------------------------------------------|---------------------------------------------------------------------------------------------------------------------------------------------------------------------------------------------------------------------------------------------------|
|                    |                                                                                                                                                                                                                                                                                              |                                                                | increasingly developed public infrastructure as Vietnam's economy grows.                                                                                                                                                                                                                                                                                                                                                                                                                                                                                                                                   |                                                                                                                                                                                                                                                   |
| Urban population   | Percentage of population living in urban areas                                                                                                                                                                                                                                               | Percent (urban people), continuous variable                    | Multiple studies have indicated association between dengue and urbanisation.                                                                                                                                                                                                                                                                                                                                                                                                                                                                                                                               | General Statistics Office of Vietnam.                                                                                                                                                                                                             |
| Housing pressure   | A metric calculated for this dissertation, using change in total population from previous to current year as numerator, and thousand square metres of new housing built for residential and domestic purposes as denominator. This gives 'new' people per new square metre of housing built. | 'New' people per new square metre housing, continuous variable | Greater density of people to housing may create a risk of overcrowded or casual housing. These in turn may have an impact on human-vector contact patterns through increased time outside the home at dawn and dusk, or greater proximity to larval maturation sites – for example in abandoned containers around casual urban or peri-urban settlements.                                                                                                                                                                                                                                                  | New housing data from reporting on construction activities and enterprise, through a network at ministerial and branch levels, and published by the General Statistics Office, Vietnam. Population change as below ( <i>population density</i> ). |
| Population density | Division of provincial population by provincial area.                                                                                                                                                                                                                                        | People per square kilometre, continuous variable               | The association between population density and dengue across Vietnam is an open question, with some highly dense areas (Hanoi, Ho Chi Minh City) exhibiting high incidence whilst Schmidt et al found a narrow range of moderate population density was associated with higher dengue incidence in Khanh-Hoa province. This metric indicates provincial interconnectedness and population mobility, which in turn may spread epidemics and increase serotype circulation. This in turn increases the risk of more severe forms of dengue warranting hospitalisation and, as a consequence, case detection. | General Statistics Office of Vietnam.                                                                                                                                                                                                             |
| Mobility           | The number of person-km travelled in a province, all forms of transport (but dominated by road traffic)                                                                                                                                                                                      | Million-person-km, continuous variable                         |                                                                                                                                                                                                                                                                                                                                                                                                                                                                                                                                                                                                            | Official surveys of transport, published by the General statistics Office of Vietnam.                                                                                                                                                             |

---

---



---

|                     |                                                                                                                                                                                                                                                                                                                                                                               |                                                           |                                                                                                                                                                                                                                                                                                                                                                                                                                       |                                                                                                                       |
|---------------------|-------------------------------------------------------------------------------------------------------------------------------------------------------------------------------------------------------------------------------------------------------------------------------------------------------------------------------------------------------------------------------|-----------------------------------------------------------|---------------------------------------------------------------------------------------------------------------------------------------------------------------------------------------------------------------------------------------------------------------------------------------------------------------------------------------------------------------------------------------------------------------------------------------|-----------------------------------------------------------------------------------------------------------------------|
| Under-1 vaccination | <p>Percentage of children under one year of age vaccinated according to the Vietnamese Ministry of Health vaccine schedule.</p>                                                                                                                                                                                                                                               | <p>Percent (under-1s vaccinated), continuous variable</p> | <p>This is an indicator for healthcare access and community engagement with the health system. The vaccine schedule for 2013–2015 does not include dengue vaccination.</p>                                                                                                                                                                                                                                                            | <p>Demographic and Health Survey reported by the Ministry of Health via the General Statistics Office of Vietnam.</p> |
| Clinician density   | <p>A metric calculated for this dissertation. All doctors, clinical assistants and nurses per province-year, as listed in official statistics on health workforce, adjusted to a per-thousand-people clinician density metric using population counts (Table 4). This excludes midwives as they are not expected to support treatment or case definition of dengue fever.</p> | <p>Clinicians per 1000 people, continuous variable</p>    | <p>As the outcome is cases reported rather than true cases, and clinicians are the agents reporting cases, clinician density is expected to be positively associated with dengue case counts. It is also an important indicator of healthcare access. Clinicians per thousand people was selected over bed or clinic numbers as it encompasses a broader range of treatment settings (such as home visits or outpatient clinics).</p> | <p>Investigations of human resources for health workforce, published by General Statistics Office of Vietnam.</p>     |

---

Supplementary Table S3. Vietnam country population summary statistics.

|                    | <b>% change annual provincial population count between two consecutive years during the period 2011-15</b> | <b>% change annual provincial population count between the first and last years of 2011-15</b> | <b>Average population count by province across the 5-year period 2011-15</b> |
|--------------------|------------------------------------------------------------------------------------------------------------|------------------------------------------------------------------------------------------------|------------------------------------------------------------------------------|
| Min                | 0.00028                                                                                                    | 0.001848                                                                                       | 305800                                                                       |
| Max                | 0.043337                                                                                                   | 0.173648                                                                                       | 7821380                                                                      |
| Mean               | 0.009944                                                                                                   | 0.042165                                                                                       | 1506176                                                                      |
| Standard Deviation | 0.00765                                                                                                    | 0.0318                                                                                         | 1,242,717                                                                    |

Supplementary Table S4. Summary statistics for spatiotemporal exposure variables 2011–2015 (2.d.p.; see Table 2 for variable descriptions).

| <b>Exposure variable (all dengue counts per 100,000 people)</b> | <b>Observations</b> | <b>Mean</b> | <b>Standard deviation</b> | <b>Min</b> | <b>Max</b> |
|-----------------------------------------------------------------|---------------------|-------------|---------------------------|------------|------------|
| Y1own                                                           | 315                 | 1166.94     | 2062.21                   | 0          | 18872.72   |
| Y2own                                                           | 315                 | 1386.78     | 2313.91                   | 0          | 18872.72   |
| Y1q1                                                            | 315                 | 1177.10     | 1520.43                   | 0          | 10968      |
| Y1q2                                                            | 315                 | 1194.92     | 1416.97                   | 1          | 9436.5     |
| Y2q1                                                            | 315                 | 1421.13     | 1597.78                   | 0          | 10968      |
| Y2q2                                                            | 315                 | 1453.09     | 1474.46                   | 1          | 9436.5     |

Supplementary Table S5. Correlation coefficients matrix, spatiotemporal variables (2.d.p.; see table 2 for variable descriptions).

|       | Y1own | Y2own | Y1q1 | Y1q2 | Y2q1 | Y2q2 |
|-------|-------|-------|------|------|------|------|
| Y1own | 1     |       |      |      |      |      |
| Y2own | 0.60  | 1     |      |      |      |      |
| Y1q1  | 0.68  | 0.45  | 1    |      |      |      |
| Y1q2  | 0.66  | 0.67  | 0.88 | 1    |      |      |
| Y2q1  | 0.46  | 0.67  | 0.66 | 0.62 | 1    |      |
| Y2q2  | 0.48  | 0.62  | 0.61 | 0.68 | 0.85 | 1    |

Supplementary Table S6. Summary statistics, socioeconomic variables (2.d.p.).

| <b>Variable</b>                                                    | <b>Obs</b> | <b>Mean (2.d.p.)</b> | <b>Std. Dev.</b> | <b>Min</b> | <b>Max</b> |
|--------------------------------------------------------------------|------------|----------------------|------------------|------------|------------|
| Poverty rate (%)                                                   | 189        | 11.59                | 8.38             | 0          | 41         |
| Population density (people per km <sup>2</sup> )                   | 189        | 481.35               | 588.58           | 45         | 3888       |
| Clinician density (clinicians per thousand people)                 | 189        | 3.13                 | 2.48             | 1          | 22         |
| Mobility (million-person-km travelled, all forms of transport)     | 189        | 1567.27              | 2396.80          | 7          | 17194      |
| Housing pressure ('new' people per square metre new housing built) | 189        | 8.45                 | 17.86            | 1          | 139        |
| Under-1 vaccination rate (%)                                       | 189        | 95.61                | 5.05             | 74         | 100        |

|                                                          |     |       |       |    |     |
|----------------------------------------------------------|-----|-------|-------|----|-----|
| Electricity access (households accessing electricity, %) | 189 | 97.25 | 5.83  | 65 | 100 |
| Urban population (%)                                     | 189 | 28.25 | 17.01 | 10 | 88  |

Supplementary Table S7. Correlation coefficients matrix, socioeconomic variables.

|                          | Poverty rate | Pop. density | Clin. density | Mobility | Housing pressure | Under 1 vacc. rate | Access to elec. | Urban population |
|--------------------------|--------------|--------------|---------------|----------|------------------|--------------------|-----------------|------------------|
| Poverty rate             | 1            |              |               |          |                  |                    |                 |                  |
| Population density       | -0.4562      | 1            |               |          |                  |                    |                 |                  |
| Clinician density        | 0.0582       | -0.1742      | 1             |          |                  |                    |                 |                  |
| Mobility                 | -0.4099      | 0.2102       | 0.5759        | 1        |                  |                    |                 |                  |
| Housing pressure         | -0.0052      | 0.5435       | -0.1336       | -0.0464  | 1                |                    |                 |                  |
| Under 1 vaccination rate | -0.2988      | 0.1604       | -0.0563       | 0.0384   | 0.0481           | 1                  |                 |                  |
| Access to electricity    | -0.4836      | 0.1671       | -0.1          | 0.0888   | -0.0402          | 0.1492             | 1               |                  |
| Urban population         | -0.3839      | 0.4355       | -0.1925       | 0.1414   | 0.4483           | 0.0453             | -0.0875         | 1                |

Supplementary Table S8. Results of the Hausman test for socioeconomic variables (2.s.f.).

| Variable              | Hausman P value (if <0.05, fixed effects more appropriate) | Appropriate model |
|-----------------------|------------------------------------------------------------|-------------------|
| Poverty               | 0.0004                                                     | Fixed effects     |
| Mobility              | 0.042                                                      | Fixed effects     |
| Access to electricity | <0.0001                                                    | Fixed effects     |
| Urban population      | <0.0001                                                    | Fixed effects     |
| Housing pressure      | 0.55                                                       | Random effects    |
| Population density    | 0.08                                                       | Random effects    |

Supplementary Table S9. Pregibon's test results for candidate models (see Table 2 for spatiotemporal variable descriptions).

| Candidate model    | Pregibon test P value |
|--------------------|-----------------------|
| 1 Mobility         | 0.0006                |
| 2 Mobility + y2q1  | 0.0002                |
| 3 Mobility + y2q2  | 0.0005                |
| 4 Mobility * y1own | 0.0001                |

Supplementary Table S10. Summary of potential candidate model regression outputs (2.s.f.; see Table 2 for description of spatiotemporal variables).

| Variable            | Fixed or random effects | Observations     | Wald chi square statistic p value | Coefficient  | Two-tailed P value for coefficient z or t test | Constant/intercept | Bayesian information criterion (if two-tailed z test p value <0.05) |         |
|---------------------|-------------------------|------------------|-----------------------------------|--------------|------------------------------------------------|--------------------|---------------------------------------------------------------------|---------|
| Potential candidate | Fixed                   | 174              | <0.0001                           | Y1own + y2q1 | -0.000080                                      | <0.001             | 2857.30                                                             |         |
|                     |                         |                  |                                   | Y2q1         | 0.000076                                       | 0.011              |                                                                     |         |
|                     |                         | Y1own + y2q2     | <0.0001                           | Y1own        | -0.000078                                      | <0.001             | 2854.92                                                             |         |
|                     |                         |                  |                                   | Y2q2         | 0.0001011                                      | 0.002              |                                                                     |         |
|                     | Random                  | 285 <sup>1</sup> | 189                               | 0.04         | Y1own                                          | -0.000088          | <0.001                                                              | 2857.29 |
|                     |                         |                  |                                   |              | Y2q1                                           | 0.00010            | <0.001                                                              | 2872.44 |
|                     |                         |                  |                                   |              | Y2q2                                           | 0.00013            | <0.001                                                              | 2868.70 |
|                     |                         |                  |                                   |              | Population density                             | -0.00036           | 0.04                                                                | 2506.15 |

<sup>1</sup> 30 observations (total n=315) dropped due to all zero outcomes

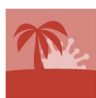

Annex B: Full results of uni-, bi-, and tri-variate regressions with and without interaction terms. Values are rounded to two significant figures; see Table 2 for spatiotemporal variable descriptions. Preliminary candidate models are marked in light green; final four candidate models are marked in dark green.

| Univariate models                      |                         |                                    |              |                                           |                                           |                                                                     |            |
|----------------------------------------|-------------------------|------------------------------------|--------------|-------------------------------------------|-------------------------------------------|---------------------------------------------------------------------|------------|
| Spatiotemporal exposures for 2011–2015 |                         |                                    |              |                                           |                                           |                                                                     |            |
| Variable                               | Fixed or random effects | Observations                       | Coefficient  | Two-tailed P value for coefficient z test | Constant/intercept                        | Bayesian information criterion (if two-tailed z test p value <0.05) |            |
| Y1own                                  |                         | N=285                              | -0.000088    | <0.001                                    | -13.69                                    | 2857.29                                                             |            |
| Y2q1                                   |                         | (6 provinces                       | 0.00010      | <0.001                                    | -14.074                                   | 2872.44                                                             |            |
| Y2q2                                   |                         | (30 obs)                           | 0.00013      | <0.001                                    | -14.11                                    | 2868.70                                                             |            |
| Y2own                                  | Fixed                   | dropped                            | 0.0000040    | 0.80                                      | -13.92                                    | N/A                                                                 |            |
| Y1q1                                   |                         | because of all                     | -0.000055    | 0.10                                      | -13.83                                    | N/A                                                                 |            |
| Y1q2                                   |                         | zero outcomes.)                    | -0.000021    | 0.59                                      | -13.89                                    | N/A                                                                 |            |
| Socioeconomic exposures for 2013–2015  |                         |                                    |              |                                           |                                           |                                                                     |            |
| Variable                               | Fixed or random effects | Observations                       | Coefficient  | Two-tailed P value for coefficient z test | Constant/intercept                        | Bayesian information criterion (if two-tailed z test p value <0.05) |            |
| Poverty                                |                         | N=174                              | -0.026       | 0.21                                      | -13.57                                    | N/A                                                                 |            |
| Mobility                               |                         | (5 provinces                       | -0.00011     | 0.02                                      | -13.54                                    | 1419.83                                                             |            |
| Electricity                            | Fixed                   | dropped due                        | -0.044       | 0.29                                      | -9.45                                     | N/A                                                                 |            |
| Urban                                  |                         | to all zero outcomes)              | -0.0032      | 0.65                                      | -13.72                                    | N/A                                                                 |            |
| Population density                     |                         | N=189                              | -0.00036     | 0.04                                      | -13.57                                    | 2506.15                                                             |            |
| Housing pressure                       | Random                  | (no provinces dropped)             | 0.00028      | 0.97                                      | -13.85                                    |                                                                     |            |
| Clinician density                      | Fixed                   | 174                                | 0.0061       | 0.87                                      | -13.84                                    |                                                                     |            |
|                                        | Random                  | 189                                | -0.019       | 0.68                                      | -13.80                                    | N/A                                                                 |            |
| Under 1 vaccination rate               | Fixed                   | 174                                | -0.0089      | 0.56                                      | -12.96                                    |                                                                     |            |
|                                        | Random                  | 189                                | -0.0010      | 0.95                                      | -13.75                                    |                                                                     |            |
| Bivariate models                       |                         |                                    |              |                                           |                                           |                                                                     |            |
| Exposure                               | Obs                     | Wald chi squared statistic P value | Coefficients |                                           | Two-tailed P value for coefficient z test | Intercept                                                           | BIC number |
| Y1own + y2q1                           | 174                     | <0.0001                            | Y1own        | -0.000080                                 | <0.001                                    | -13.82                                                              | 2857.30    |
|                                        |                         |                                    | Y2q1         | 0.000076                                  | 0.011                                     |                                                                     |            |
| Y1own + y2q2                           |                         | <0.0001                            | Y1own        | -0.000078                                 | <0.001                                    | -13.86                                                              | 2854.92    |

|                               |        |      |          |               |       |        |         |
|-------------------------------|--------|------|----------|---------------|-------|--------|---------|
|                               |        |      | Y2q2     | 0.0001011     | 0.002 |        |         |
| Y2q1 + y2q2                   | 0.0001 |      | Y2q1     | 0.00011       | 0.005 | -14.16 | N/A     |
|                               |        |      | Y2q2     | 0.000063      | 0.071 |        |         |
| Mobility + y1own              | 0.027  |      | Mobility | -0.00010      | 0.032 | -13.46 | N/A     |
|                               |        |      | Y1own    | -0.000066     | 0.18  |        |         |
| Mobility + y2q1               | 0.0075 |      | Mobility | -0.00011      | 0.022 | -13.71 | 1420.88 |
|                               |        |      | Y2q1     | 0.00014       | 0.038 |        |         |
| Mobility + y2q2               | 0.0093 |      | Mobility | -0.00010      | 0.033 | -13.73 | 1421.30 |
|                               |        |      | Y2q2     | 0.00014       | 0.05  |        |         |
| <b>With interaction terms</b> |        |      |          |               |       |        |         |
| Y1own * y2q1                  | 0.98   |      |          | 0.00000000056 | 0.98  | -13.82 | N/A     |
| Y1own * y2q2                  | 0.64   |      |          | -0.000000010  | 0.64  | -13.80 | N/A     |
| Y2q1 * y2q2                   | 174    | 0.29 |          | 0.000000025   | 0.29  | -13.88 | N/A     |
| Mobility * y1own              | 0.017  |      |          | -0.000000041  | 0.017 | -13.63 | 1417.95 |

**Trivariate models**

| Variables                      | Wald chi squared statistic | Regression coefficient value | Two-tailed P value for coefficient z test | Constant/intercept | Bayesian information criterion (if two-tailed z test p value <0.05 for both exposure variables) |
|--------------------------------|----------------------------|------------------------------|-------------------------------------------|--------------------|-------------------------------------------------------------------------------------------------|
| Y1own + y2q1 + y2q2            | <0.0001                    | Y1own                        | -                                         |                    |                                                                                                 |
|                                |                            | Y2q1                         | 0.000075                                  | <0.001             |                                                                                                 |
|                                |                            | Y2q2                         | 0.000081                                  | 0.03               | -13.90                                                                                          |
|                                |                            | Mobility                     | 0.000045                                  | 0.20               |                                                                                                 |
| Mobility + y1own + y2q1        | 0.0069                     | Mobility                     | -0.00010                                  | 0.03               |                                                                                                 |
|                                |                            | Y1own                        | -                                         | 0.14               | -13.62                                                                                          |
|                                |                            | Y2q1                         | 0.000074                                  | 0.029              |                                                                                                 |
| Mobility + y1own + y2q2        | 0.0057                     | Mobility                     | -                                         | 0.055              |                                                                                                 |
|                                |                            | Y1own                        | 0.000092                                  | 0.092              | -13.65                                                                                          |
|                                |                            | Y2q2                         | 0.000086                                  | 0.022              |                                                                                                 |
| Mobility + y2q1 + y2q2         | 0.017                      | Mobility                     | -0.00011                                  | 0.027              |                                                                                                 |
|                                |                            | Y2q1                         | 0.000068                                  | 0.52               | -13.75                                                                                          |
|                                |                            | Y2q2                         | 0.000092                                  | 0.36               |                                                                                                 |
| <b>With interaction terms</b>  |                            |                              |                                           |                    |                                                                                                 |
| Y1own * y2q1 + y2q2            | 0.83                       |                              |                                           | 0.83               | -13.81                                                                                          |
|                                |                            |                              | -0.0000000000022                          |                    |                                                                                                 |
| Mobility * y2q1 + y1own + y2q2 | 0.91                       |                              |                                           | 0.91               | -13.82                                                                                          |
|                                |                            |                              | -0.00000000000091                         |                    |                                                                                                 |
| Mobility * y2q2                | 0.70                       |                              |                                           | 0.70               | -13.80                                                                                          |
|                                |                            |                              | -0.00000000000039                         |                    |                                                                                                 |



---

|            |      |                   |      |        |     |
|------------|------|-------------------|------|--------|-----|
| Mobility * |      |                   |      |        |     |
| y2q1 *     | 0.84 | -0.00000000000092 | 0.84 | -13.81 | N/A |
| y2q2       |      |                   |      |        |     |

---

Supplementary Figure S1. Moran's I graphs demonstrating cross-provincial spatial autocorrelation for second order queen contiguous neighbours, 2011–2015.

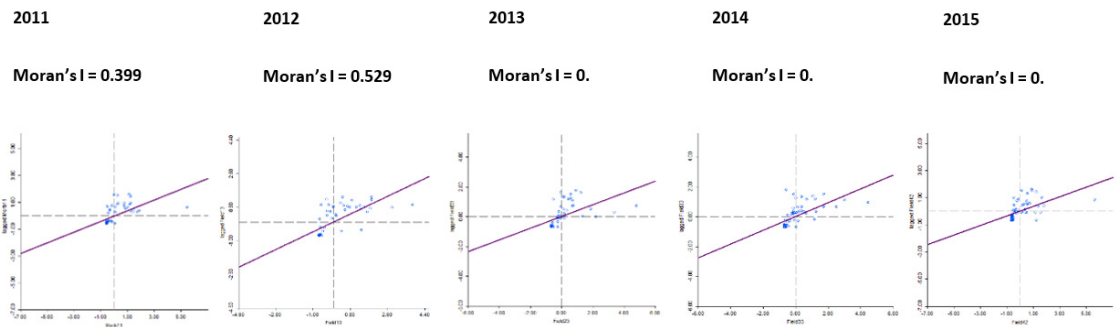

Raw residual plots for model 1 (left) and model 4 (right)

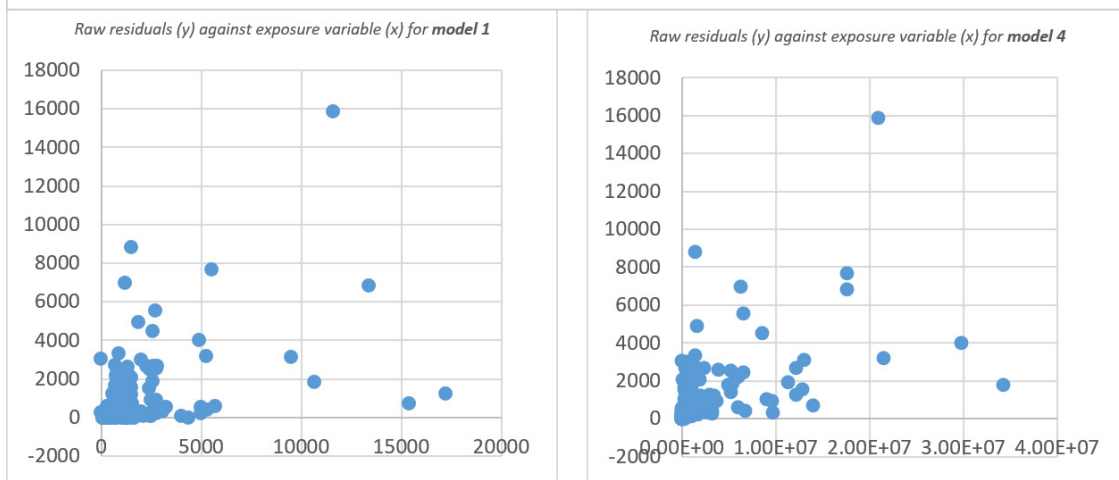

Raw residual plots for model 2, with first order contiguous neighbours two years previous (left) and mobility

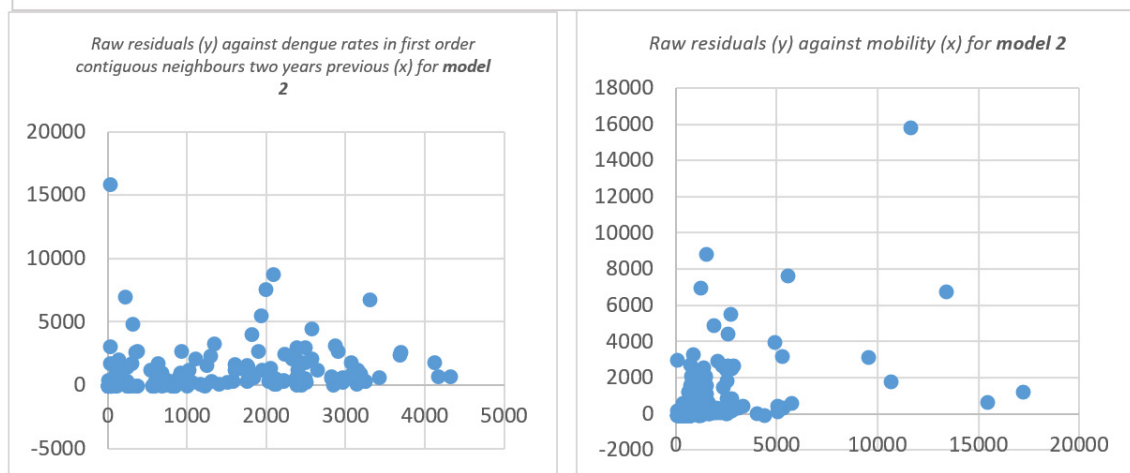

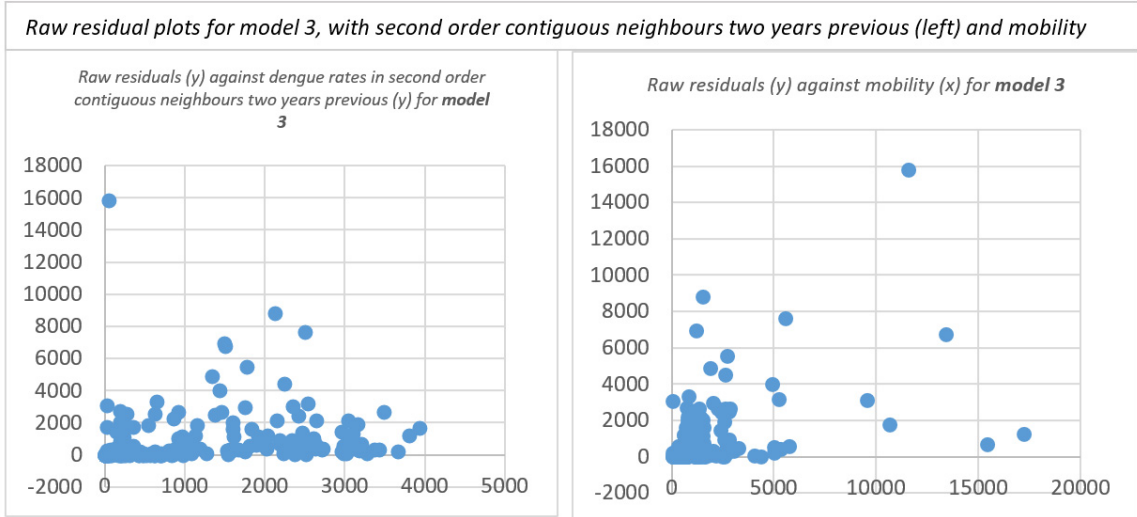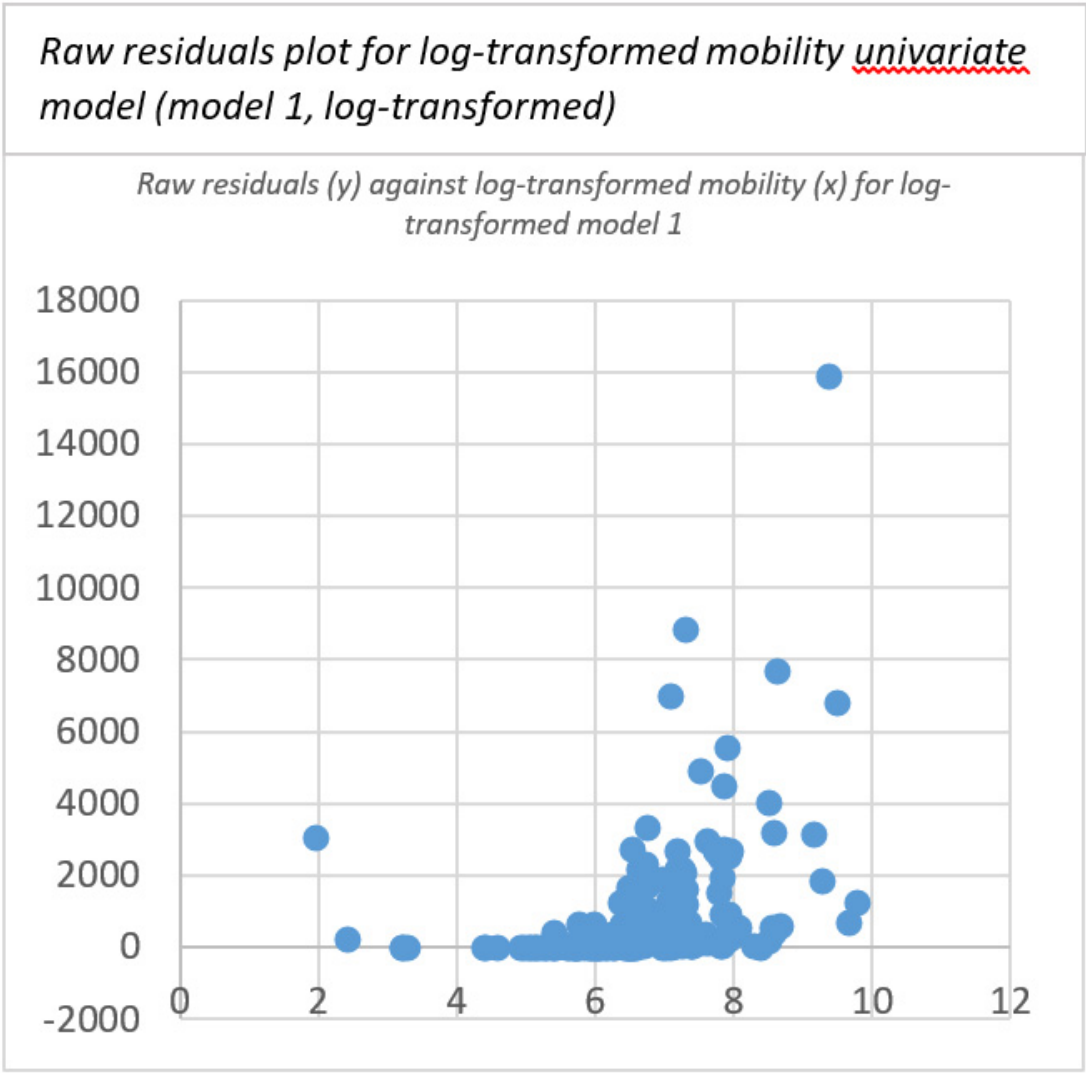

Supplement: s1 [file s1]
